# Supplementary material for: The Prognostic Value of the GNRI in Patients with Stomach Cancer Undergoing Surgery
Source: MDPI journal article supplement (doi:10.3390/jpm13010155), 2023-01-13
Supplement: s1 [file s1]

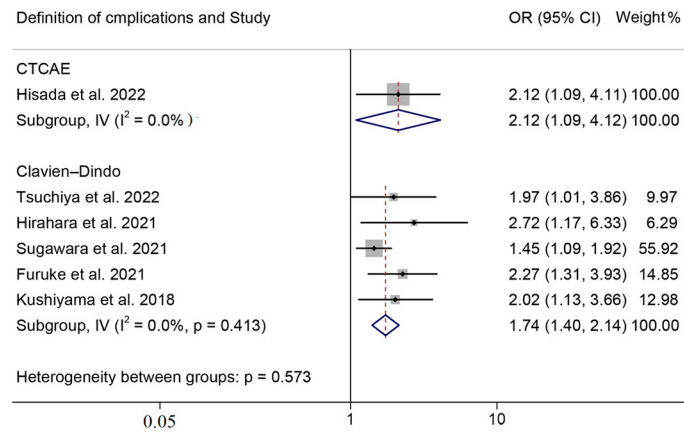

**Figure S1.** Subgroup analysis of postoperative complications based on the definition of complications. OR, odds ratio; CL, confidence interval [14,17,19-21,23].

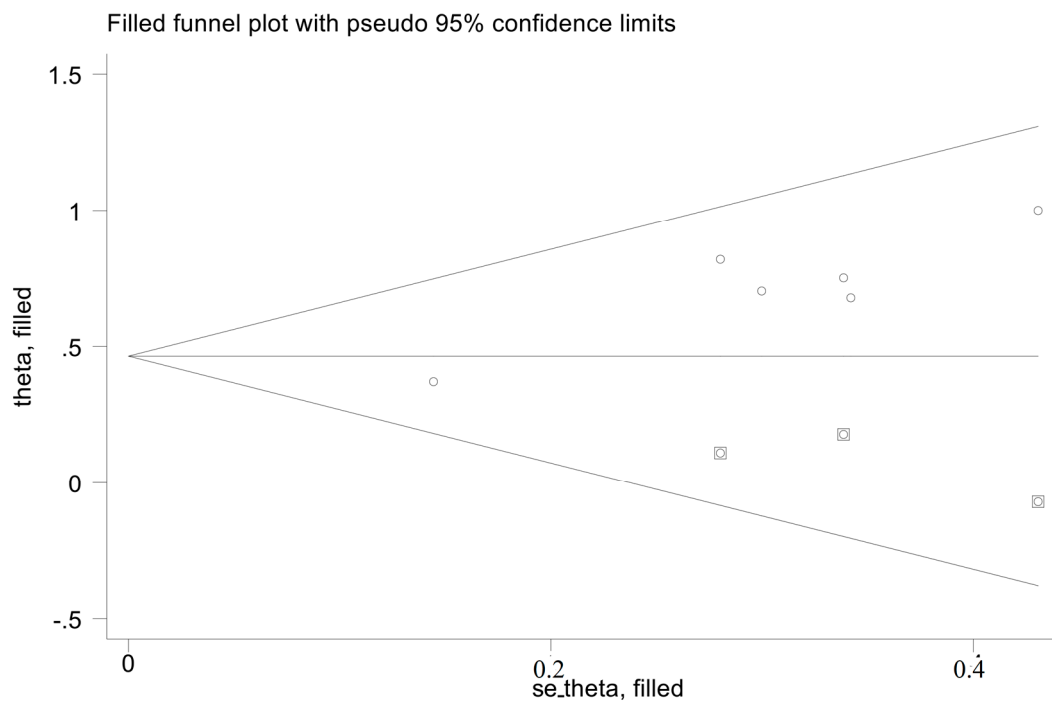

**Figure S2.** The picture of the trim and fill method. Theta, the effect estimate; Se\_theta, the corresponding standard error; The circles represent the studies included in this meta-analysis; Boxes with circles represent additional studies of the trim and fill method.
