# Supplementary material for: The Prognostic Value of the GNRI in Patients with Stomach Cancer Undergoing Surgery
Source: J Pers Med. 2023 Jan 13;13(1):155. doi: 10.3390/jpm13010155 (PMC9861269; doi:10.3390/jpm13010155)
Supplement: Supplementary file 1 [file jpm-13-00155-s001.zip › Table S1.xlsx]

## Sheet: Sheet1
Table S1. Hospitals implementing the 11 studies
Study	Hospitals recruiting patients
An et al. 2022	Kyung Hee University Hospital
Hisada et al. 2022	University of Tokyo Hospital
Yoshikawa et al. 2022	Kitano Hospital
Tsuchiya et al. 2022	Yokohama City University Medical Center
Hirahara et al. 2021	Shimane University Faculty of Medicine
Sugawara et al. 2021	University of Tokyo Hospital
Furuke et al. 2021	Kyoto Prefectural University of Medicine
Hirahara et al. 2020	Shimane University Faculty of Medicine
Kushiyama et al. 2018	Osaka City General Hospital
Toya et al. 2022	Iwate Medical University
	Sendai City Medical Center
	Fukushima Medical University
	Ohara General Hospital
	Fukushima Medical University Hospital
	Tohoku Medical and Pharmaceutical University
	Tohoku University Graduate School of Medicine
	Iwate Prefectural Isawa Hospital
	Osaki Citizen Hospital
	Akita University Graduate School of Medicine
	Yokote Municipal Hospital
	Miyagi Cancer Center
	Aomori Prefectural Central Hospital
	Iwate Prefectural Central Hospital
	Yamagata University
	Noshiro Kosei Medical Center
	Akita City Hospital
	Akita Red Cross Hospital
	Aomori City Hospital
	Hiraka General Hospital
	National Hospital Organization Sendai Medical Center
	Iwate Prefectural Ninohe Hospital
	Tohoku Rosai Hospital
	Japanese Red Cross Morioka Hospital
	Hachinohe Red Cross Hospital
	Iwate Prefectural Kuji Hospital
	Hirosaki University Graduate School of Medicine
	Omagari Kosei Medical Center
	Iwate Prefectural Ofunato Hospital
	Iwate Prefectural Miyako Hospital
	Southern-Tohoku General Hospital
	School of Medicine, Iwate Medical University
Matsunaga et al. 2022	Tottori University Faculty of Medicine
	Japanese Red Cross Tottori Hospital
	Tottori Prefectural Central Hospital
	Hamada Medical Center
	Tottori Prefectural Kousei Hospital
	Sanin Rosai Hospital
	Yonago Medical Center of National Hospital Organization
	Japanese Red Cross Masuda Hospital
	Tottori Seikyo Hospital
	Yasugi Municipal Hospital
	Hakuai Hospital
	The Nanbu Town National Health Insurance Saihaku Hospital
